# Supplementary material
Source: HighWire-hosted journal article supplement (http://www.qdcxjkg.com/highwire/filestream/113315/field_highwire_adjunct_files/0/tables_supplementary_data.pdf)
Supplement: tables_supplementary_data.pdf [file tables_supplementary_data.pdf]

Table s1: Level of asthma control at V0, V1 and V2 according to patient baseline characteristics

| Patient characteristics | Visit (n)  | Controlled :<br>Good control<br>% (n) | Not controlled:          |                       | P value :<br>controlled<br>versus not<br>controlled |                      |
|-------------------------|------------|---------------------------------------|--------------------------|-----------------------|-----------------------------------------------------|----------------------|
|                         |            |                                       | Partial control<br>% (n) | Poor control<br>% (n) |                                                     |                      |
| Age                     | < 12       | V0 (47)                               | 0 (0)                    | 15 (7)                | 85 (40)                                             | V1:0.40<br>V2 :0.02  |
|                         |            | V1 (46)                               | 48 (22)                  | 30 (14)               | 22 (10)                                             |                      |
|                         | V2 (41)    | 53.5 (22)                             | 36.5 (15)                | 10 (4)                |                                                     |                      |
| ≥ 12                    | V0 (57)    | 0 (0)                                 | 21 (12)                  | 79 (45)               |                                                     |                      |
|                         | V1 (57)    | 56 (32)                               | 30 (17)                  | 14 (8)                |                                                     |                      |
|                         | V2 (51)    | 76.5 (39)                             | 15.5 (8)                 | 8 (4)                 |                                                     |                      |
| Exacerbation rate       | ≥ 3        | V0 (67)                               | 0 (0)                    | 16.5 (11)             | 83.5 (56)                                           | V1:0.29<br>V2:0.60   |
|                         |            | V1 (67)                               | 56.5 (38)                | 34.5 (23)             | 9 (6)                                               |                      |
|                         | V2 (61)    | 69 (42)                               | 24.5 (15)                | 6.5 (4)               |                                                     |                      |
| < 3                     | V0 (36)    | 0 (0)                                 | 22 (8)                   | 78 (28)               |                                                     |                      |
|                         | V1 (35)    | 46 (16)                               | 20 (7)                   | 34 (12)               |                                                     |                      |
|                         | V2 (30)    | 63 (19)                               | 23.5 (7)                 | 13.5 (4)              |                                                     |                      |
| IgE level               | ≤ 700 kU/l | V0 (47)                               | 0 (0)                    | 21 (10)               | 79 (37)                                             | V1:0.40<br>V2:0.71   |
|                         |            | V1 (46)                               | 48 (22)                  | 35 (16)               | 17 (8)                                              |                      |
|                         | V2 (45)    | 64.5 (29)                             | 22 (10)                  | 13.5 (6)              |                                                     |                      |
| > 700 kU/l              | V0 (57)    | 0 (0)                                 | 16 (9)                   | 84 (48)               |                                                     |                      |
|                         | V1 (57)    | 56 (32)                               | 26.5 (15)                | 17.5 (10)             |                                                     |                      |
|                         | V2 (47)    | 68 (32)                               | 27.5 (13)                | 4.5 (2)               |                                                     |                      |
| Allergen sensitivity    | < 3        | V0 (35)                               | 0                        | 17 (6)                | 83 (29)                                             | V1 :0.49<br>V2 :0.32 |
|                         |            | V1 (35)                               | 57 (20)                  | 26 (9)                | 17 (6)                                              |                      |
|                         | V2 (30)    | 73 (22)                               | 13.5 (4)                 | 13.5 (4)              |                                                     |                      |
| ≥ 3                     | V0 (69)    | 0                                     | 19 (13)                  | 81 (56)               |                                                     |                      |
|                         | V1 (68)    | 50 (34)                               | 32.5 (22)                | 17.5 (12)             |                                                     |                      |
|                         | V2 (62)    | 63 (39)                               | 30.5 (19)                | 6.5 (4)               |                                                     |                      |
| Dosing regimen          | 2 weeks    | V0 (71)                               | 0 (0)                    | 17 (12)               | 83 (59)                                             | V1:0.92<br>V2:0.37   |
|                         |            | V1 (71)                               | 52 (37)                  | 28 (20)               | 20 (14)                                             |                      |
|                         | V2 (62)    | 69.5 (43)                             | 22.5 (14)                | 8 (5)                 |                                                     |                      |
| 4 weeks                 | V0 (33)    | 0 (0)                                 | 21 (7)                   | 79 (26)               |                                                     |                      |
|                         | V1 (32)    | 53 (17)                               | 34.5 (11)                | 12.5 (4)              |                                                     |                      |
|                         | V2 (30)    | 60 (18)                               | 30 (9)                   | 10 (3)                |                                                     |                      |

Table s2: Outcomes according to dosing regimen

| outcome                                       | 2 weeks           | 4 weeks           | P value |
|-----------------------------------------------|-------------------|-------------------|---------|
| Exacerbation rate over the year (n/year)      | 1.42 [0.40; 2.44] | 0.90 [0.50; 1.30] | 0.89    |
| FEV1 at V2 (% PV)                             | 92 [88; 95]       | 93 [82; 104]      | 0.89    |
| ICS dose at V2 (fluticasone equivalent, µg/d) | 458 [373; 543]    | 530 [401; 659]    | 0.32    |

FEV1: forced expiratory volume in 1 second; PV: predicted value; ICS: inhaled corticosteroids

Table s3: Outcomes according to age

| outcome                                       | < 12 years old    | ≥ 12 years old    | P value |
|-----------------------------------------------|-------------------|-------------------|---------|
| Exacerbation rate over the year               | 1.85 [0.33; 3.40] | 0.76 [0.45; 1.08] | 0.049   |
| FEV1 at V2 (% PV)                             | 93 [85; 101]      | 91 [86; 96]       | 0.99    |
| ICS dose at V2 (fluticasone equivalent, µg/d) | 475 [369; 581]    | 486 [390; 582]    | 0.79    |

FEV1: forced expiratory volume in 1 second; PV: predicted value; ICS: inhaled corticosteroids

Table s4: Outcomes in the subgroup of children with baseline IgE > 700 kU/l (n=57)

| outcome                                                          | Correlation | P value |
|------------------------------------------------------------------|-------------|---------|
| Exacerbation rate over the year                                  | Rho: -0.06  | 0.68    |
| FEV1 at V2 (%PV)                                                 | Rho:-0.15   | 0.38    |
| ICS dose at V2 (fluticasone equivalent, $\mu\text{g}/\text{d}$ ) | Rho: -0.05  | 0.73    |

FEV1: forced expiratory volume in 1 second; PV: predicted value; ICS: inhaled corticosteroids

Table s5: Omalizumab studies in children: main results

| Study design<br>Duration                         | No of patients,<br>Age, IgE level                                                                          | Severity scoring                                                                                                           | Treatment dose<br>frequency                              | Outcomes<br>(significant difference)                                                                                                                                                                                                        |
|--------------------------------------------------|------------------------------------------------------------------------------------------------------------|----------------------------------------------------------------------------------------------------------------------------|----------------------------------------------------------|---------------------------------------------------------------------------------------------------------------------------------------------------------------------------------------------------------------------------------------------|
| Milgrom H <sup>6</sup><br>DBPCT<br>28 weeks      | 334 children<br>5-12 years<br>IgE: 30-1300 kU/l<br>Mean : 335 kU/l                                         | Moderate-severe<br>allergic asthma                                                                                         | 0.016 mg/kg/IgE<br>every 2-4 weeks                       | - Median reduction of ICS<br>dose:<br>Omalizumab: 100%<br>Placebo: 66.7%<br>- Exacerbation rate:<br>Omalizumab vs placebo:-36%<br>- Physicians/patients evaluation<br>(GETE*) excellent/good :<br>omalizumab : 31.5/56%<br>placebo : 16/33% |
| Busse WW <sup>4</sup><br>DBPCT<br>60 weeks       | 419 patients<br>6-20 years<br>IgE: 30-1300 kU/l                                                            | Moderate-severe<br>allergic asthma:<br>73%                                                                                 | 0.016 mg/kg/IgE<br>every 2-4 weeks                       | Omalizumab vs placebo:<br>- Number of days with asthma<br>symptoms: -25.5%<br>- % of patients with $\geq 1$<br>exacerbation : -38%                                                                                                          |
| Lanier <sup>5</sup><br>DBPCT<br>52 weeks         | 627 children, 6 to<br>< 12 years<br><br>IgE: 30-1300 kU/l<br>Mean : 470 kU/l                               | Moderate-severe<br>uncontrolled<br>allergic asthma<br>(Severe: 37.5%)<br>history of severe<br>exacerbations                | 75 to 375 mg<br>according to<br>table every 2-4<br>weeks | Omalizumab vs placebo:<br>- exacerbation rate : -43%<br>- severe exacerbation: -50%<br>-physicians/patients evaluation<br>(GETE*) excellent/good :<br>omalizumab : 79%/ 80%<br>placebo : 56/72%                                             |
| Kulus M <sup>7</sup><br>DBPCT<br>52 weeks        | 246 children<br>Sub-analysis<br>restricted to severe<br>asthmatic children<br>of Lanier study              | Severe allergic<br>asthma with<br>exacerbations and<br>symptoms despite<br>treatment with high<br>ICS dose plus a<br>LABA. | 75 to 375 mg<br>according to<br>table every 2-4<br>weeks | Omalizumab vs placebo:<br>exacerbations : -50%                                                                                                                                                                                              |
| Brodie <sup>8</sup><br>observational<br>16 weeks | 34 children (5-16<br>years, 15 children<br><12 years )<br><br>IgE: 30-1300kU/l<br>Median IgE : 411<br>kU/l | Severe asthma<br>maintained on oral<br>prednisolone                                                                        | 75 to 375 mg<br>according to<br>table every 2-4<br>weeks | - Median daily prednisolone<br>dose reduced from 20 mg to 5<br>mg including seven children<br>who stopped prednisolone<br>completely.<br>-Mini-AQLQ score increased<br>from 3.5 to 5.9.                                                     |
| Current study<br>Observational<br>52 weeks       | 104 children (6-18<br>years, 47 children<br>< 12 years)<br><br>Median IgE: 1125<br>kU/l                    | Severe allergic<br>asthma                                                                                                  | 75 to 375 mg<br>according to<br>table every 2-4<br>weeks | - control improvement :<br>good control : 0% at initiation,<br>67% at week 52<br>-exacerbation rate: -72%                                                                                                                                   |

GETE: global evaluation of treatment effectiveness; AQLQ: Asthma Quality of Life Questionnaire  
ICS: inhaled corticosteroids; LABA: long acting  $\beta_2$  agonists
